# Supplementary material for: Reconstructing the Deep Population History of Central and South America
Source: PubMed Central journal article supplement (PMC6327247; doi:10.1016/j.cell.2018.10.027), 2018-11-15
Supplement: mmc2.pdf [file mmc2.pdf]

**Table S2. Affinity of Early South Americans to North Americans.** Representative  $f_4$ -statistics on 1240K dataset of the form  $f_4(\text{Mbuti}, \text{Anzick-1}; \text{Early South American}, \text{Brazil\_LapaDoSanto\_9600BP}$  or  $\text{Late Central Andes})$  or  $f_4(\text{Mbuti}, \text{Canada\_Lucier\_4800BP-500BP}; \text{Brazil\_LapaDoSanto\_9600BP}$  or  $\text{Brazil\_Laranjal\_6700BP}, \text{Late or Modern Peruvian or Chilean})$ . Related to Table S4.

| Outgroup | North America              | Early South American         | Other                     | $f_4$ -statistic | Z-score | Number of SNPs |
|----------|----------------------------|------------------------------|---------------------------|------------------|---------|----------------|
| Mbuti    | USA_Anzick-1_12800BP       | Peru_Lauricocha_8600BP       | Chile_LosRieles_10900BP   | 0.002834         | 3.425   | 762,120        |
| Mbuti    | USA_Anzick-1_12800BP       | Peru_Cuncaicha_9000BP        | Chile_LosRieles_10900BP   | 0.002241         | 2.477   | 726,818        |
| Mbuti    | USA_Anzick-1_12800BP       | Argentina_ArroyoSeco2_7700BP | Chile_LosRieles_10900BP   | 0.001552         | 2.020   | 754,332        |
| Mbuti    | USA_Anzick-1_12800BP       | Peru_Lauricocha_8600BP       | Brazil_LapaDoSanto_9600BP | 0.001633         | 3.109   | 955,886        |
| Mbuti    | USA_Anzick-1_12800BP       | Peru_Cuncaicha_9000BP        | Brazil_LapaDoSanto_9600BP | 0.001005         | 1.542   | 875,139        |
| Mbuti    | USA_Anzick-1_12800BP       | Argentina_ArroyoSeco2_7700BP | Brazil_LapaDoSanto_9600BP | 0.000384         | 0.803   | 932,942        |
| Mbuti    | USA_Anzick-1_12800BP       | Peru_Lauricocha_8600BP       | Peru_Cuncaicha_4200BP     | 0.001944         | 3.007   | 834,310        |
| Mbuti    | USA_Anzick-1_12800BP       | Peru_Cuncaicha_9000BP        | Peru_Cuncaicha_4200BP     | 0.001489         | 1.989   | 794,865        |
| Mbuti    | USA_Anzick-1_12800BP       | Argentina_ArroyoSeco2_7700BP | Peru_Cuncaicha_4200BP     | 0.000749         | 1.197   | 823,581        |
| Mbuti    | Canada_Lucier_4800BP-500BP | Brazil_LapaDoSanto_9600BP    | Peru_Quechua_Modern       | 0.001442         | 3.290   | 204,960        |
| Mbuti    | Canada_Lucier_4800BP-500BP | Brazil_Laranjal_6700BP       | Peru_Quechua_Modern       | 0.002161         | 3.429   | 116,092        |
| Mbuti    | Canada_Lucier_4800BP-500BP | Brazil_LapaDoSanto_9600BP    | Peru_Aymara_Modern        | 0.00149          | 2.445   | 208,965        |
| Mbuti    | Canada_Lucier_4800BP-500BP | Brazil_Laranjal_6700BP       | Peru_Aymara_Modern        | 0.001889         | 2.336   | 118,118        |
| Mbuti    | Canada_Lucier_4800BP-500BP | Brazil_LapaDoSanto_9600BP    | Peru_LaGalgada_4100BP     | 0.002109         | 3.567   | 178,534        |
| Mbuti    | Canada_Lucier_4800BP-500BP | Brazil_Laranjal_6700BP       | Peru_LaGalgada_4100BP     | 0.002678         | 3.262   | 108,672        |
| Mbuti    | Canada_Lucier_4800BP-500BP | Brazil_LapaDoSanto_9600BP    | Peru_Laramate_900BP       | 0.001158         | 2.606   | 192,122        |
| Mbuti    | Canada_Lucier_4800BP-500BP | Brazil_Laranjal_6700BP       | Peru_Laramate_900BP       | 0.002455         | 3.917   | 113,762        |
| Mbuti    | Canada_Lucier_4800BP-500BP | Brazil_LapaDoSanto_9600BP    | Chile_PicaOcho_700BP      | 0.000528         | 0.722   | 101,447        |
| Mbuti    | Canada_Lucier_4800BP-500BP | Brazil_Laranjal_6700BP       | Chile_PicaOcho_700BP      | 0.001542         | 1.617   | 69,706         |
| Mbuti    | Canada_Lucier_4800BP-500BP | Brazil_LapaDoSanto_9600BP    | Chile_Conchali_700BP      | 0.000924         | 1.796   | 179,370        |
| Mbuti    | Canada_Lucier_4800BP-500BP | Brazil_Laranjal_6700BP       | Chile_Conchali_700BP      | 0.00201          | 2.739   | 109,689        |
| Mbuti    | Canada_Lucier_4800BP-500BP | Brazil_LapaDoSanto_9600BP    | Peru_Cuncaicha_4200BP     | 0.001019         | 1.594   | 173,982        |
| Mbuti    | Canada_Lucier_4800BP-500BP | Brazil_Laranjal_6700BP       | Peru_Cuncaicha_4200BP     | 0.002244         | 2.617   | 107,094        |
| Mbuti    | Canada_Lucier_4800BP-500BP | Brazil_LapaDoSanto_9600BP    | Peru_Cuncaicha_3300BP     | 0.000325         | 0.495   | 155,599        |
| Mbuti    | Canada_Lucier_4800BP-500BP | Brazil_Laranjal_6700BP       | Peru_Cuncaicha_3300BP     | 0.00074          | 0.853   | 98,694         |
